## A wheat chromosome segment substitution line series supports characterisation and use of progenitor genetic variation

Richard Horsnell<sup>1‡</sup>, Fiona J Leigh<sup>1‡</sup>, Tally IC Wright<sup>1‡</sup>, Amanda J Burridge<sup>2</sup>, Aleksander Ligeza<sup>1</sup>, Alexandra M. Przewieslik-Allen<sup>2</sup>, Philip Howell<sup>1</sup>, Cristobal Uauy<sup>3</sup>, Keith J. Edwards<sup>2</sup>, Alison R Bentley<sup>1,4\*</sup>

<sup>1</sup>The John Bingham Laboratory, NIAB, 93 Lawrence Weaver Road, Cambridge, UK

<sup>2</sup>Life Sciences, University of Bristol, Bristol, BS8 1TQ, UK

<sup>3</sup>John Innes Centre, Norwich Research Park, Norwich, NR4 7UH, UK

<sup>4</sup>Current address: International Wheat and Maize Improvement Center (CIMMYT), El Batan, Mexico

\*Corresponding author: [a.bentley@cgiar.org](mailto:a.bentley@cgiar.org)

‡These authors contributed equally to this work

### 1 Abstract

2 Genome-wide introgression and substitution lines have been developed in many plant species,  
3 enhancing mapping precision, gene discovery and the identification and exploitation of  
4 variation from wild relatives. Created over multiple generations of crossing and/or  
5 backcrossing accompanied by marker-assisted selection, the resulting introgression lines are a  
6 fixed genetic resource. In this study we report the development of spring wheat chromosome  
7 segment substitution lines generated to systematically capture genetic variation from tetraploid  
8 (*Triticum turgidum* ssp *dicoccoides*) and diploid (*Aegilops tauschii*) progenitor species.  
9 Generated in a common genetic background over four generations of backcrossing, the material  
10 is a base resource for the mapping and characterisation of wheat progenitor variation. To  
11 facilitate further exploitation the final population was genetically characterised using a high-  
12 density genotyping array and a range of agronomic and grain traits assessed to demonstrate the  
13 the potential use of the populations for trait localisation in wheat.

14

15 **Keywords:** introgression, CSSL, *Aegilops tauschii*, *Triticum aestivum*

16

17

## 18 Introduction

19 Hexaploid wheat (*Triticum aestivum*) arose through natural hybridization between the  
20 tetraploid grass species *T. turgidum* and the diploid species *Aegilops tauschii* (Fu & Somers,  
21 2009). The infrequency of hybridisation resulted in limited genetic diversity (Cox, 1997) and  
22 progenitor species are a valuable source of variation (Zhang *et al.*, 2015). Numerous strategies  
23 have been proposed and deployed to capture this for application in genetic studies and wheat  
24 breeding (Leigh *et al.*, 2022).

25 A wealth of genomic and germplasm resources is now available for functional genetic  
26 characterisation in polyploid wheat (Adamski *et al.*, 2020). This includes mapping and gene  
27 discovery resources for wild relatives (e.g. stable wild wheat introgression lines developed by  
28 Grewal *et al.*, 2020). These build on early cytogenetic resources including monosomic and  
29 nullisomic chromosome substitution lines series (Sears, 1954; Unrau *et al.*, 1956) which  
30 supported the foundations of wheat genetics (Kuspira and Unrau, 1957; Law, 1966). The  
31 original monosomics took over 25 years to develop (Berke *et al.*, 1992) and were used to  
32 characterise a range of traits (Zemetra *et al.*, 1986) as well as to create reciprocal series of  
33 chromosome substitution lines, allowing genetic trait mapping (Berke *et al.*, 1992).

34 Substitution line series serve many purposes. Law (1966) described their benefits as  
35 three-fold: (1) localisation of genetic effects enabling targeted use in breeding, (2) revealing  
36 genetic trait architecture and relating it to patterns of descent and (3) validating predictions of  
37 magnitude of genetic effects. Their direct use in breeding has been demonstrated as base  
38 populations for trait mapping and line selection (Eshed *et al.*, 1992), identification (Basava,  
39 2019) and transfer of wild species variation (Eshed & Zamir, 1994; Nie *et al.*, 2015) and  
40 pyramiding of target regions or introgression segments (Ali *et al.*, 2010). In understanding trait  
41 architecture, they support precise QTL mapping (Basava, 2019) and fine mapping (Fulop *et al.*  
42 *et al.*, 2016), gene discovery and cloning (Eshed & Zamir, 1994) along with marker development  
43 (Qiao *et al.*, 2016). Substitution lines typically show little variation for agronomic (growth and  
44 development) traits and can be used to confirm predicted magnitude of genetic effect, thereby  
45 increasing homogeneity between experiments (Keurentjes *et al.*, 2007) as well as eliminating  
46 the interference of genetic background (Zhai *et al.*, 2016). They are permanent populations  
47 (Zhai *et al.*, 2016) that can be maintained as immortal seed stocks allowing assessment across  
48 environments and traits (Keurentjes *et al.*, 2007), thereby increasing statistical power to detect  
49 small effects QTLs and accurately determine the magnitude of genotype x environment  
50 interactions (Rae *et al.*, 1999; Keurentjes *et al.*, 2007).

51 Chromosome segment substitution lines (CSSLs) are a form of substitution series and  
52 capture genome-wide diversity from a donor species in a fixed genetic background. First  
53 described in tomato as a series of interspecific introgression lines capturing small, overlapping  
54 chromosome segments of the wild species *Lycopersicon pennellii* into cultivated tomato (*L.*  
55 *esculentum*; Eshed *et al.*, 1992; Eshed & Zamir, 1994) the resulting lines were used to map  
56 quantitative traits including yield (Eshed & Zamir, 1995; Fridman *et al.*, 2004) and leaf  
57 characters (Holtan & Hake, 2003). The introgression lines have been subsequently used to  
58 detect thousands of QTLs for adaptation, morphological characters, yield, metabolism and fruit  
59 quality traits (reviewed in Lippman *et al.*, 2007) and cellular features underlying leaf traits  
60 (Chitwood *et al.*, 2013).

61 Further application has been demonstrated in the model species *Arabidopsis thaliana*  
62 (Keurentjes *et al.*, 2007; Fletcher *et al.*, 2013) as well as in several cultivated crops including  
63 rice (reviewed by Ali *et al.*, 2010), brassica (Howell *et al.*, 1996; Ramsay *et al.*, 1996; Rae *et*  
64 *al.*, 1999; Li *et al.*, 2015), peanut (Fonceka *et al.*, 2012), durum wheat (Blanco *et al.*, 2006) and  
65 pearl millet (Kumari *et al.*, 2014; Basava *et al.*, 2019). A recent review of resources by  
66 Balakrishnan *et al.* (2019) detailed populations available over sixteen cultivated crop species.

67 Despite the importance of wheat in global food security and its limited diversity due to  
68 evolutionary history (Stebbins, 1950; Gross & Olsen, 2010) there are few substitution resources  
69 available beyond the foundation monosomic and nullisomic series. In hexaploid wheat Zemetra  
70 *et al.* (1986) used the Nebraska reciprocal CSSL series to map heading date. More recently Gu  
71 *et al.* (2015) developed four sets of hexaploid introgression lines capturing the endemic  
72 Chinese wheat subspecies *T. aestivum yunnanense*, *tibetanum* and *petropavlovskyi* along with  
73 a synthetic hexaploid wheat. The lines were used to map QTLs for height, spike length and  
74 grain number per spike and several lines were identified for use in breeding to incorporate  
75 favourable introgression segments. In tetraploid wheat, Joppa and Cantrell (1990) created a  
76 ‘Langdon’(durum)-*T. dicoccoides* substitution series via crossing between a high grain protein  
77 content (GPC) *T. dicoccoides* donor and a series of ‘Langdon’ D-genome disomic substitution  
78 lines. This allowed the identification of lines with superior GPC, subsequently leading to its  
79 mapping on chromosome 6B (*QGpc.ndsu-6Bb*; Joppa *et al.*, 1997). Further refinement of  
80 mapping to the 6B short arm (Olmos *et al.*, 2003) provided the basis for the cloning of the  
81 *GRAIN PROTEIN CONTENT-B1* (*GPC-B1*) gene (Uauy *et al.*, 2006a; Uauy *et al.*, 2006b).  
82 This demonstrates the utility of precision introgression resources for trait mapping and gene  
83 cloning. In durum wheat, Blanco *et al.* (2006) also developed a set of 92 backcross  
84 introgression lines using *T. turgidum* ssp. *dicoccoides*. Developed to capture high GPC from

85 the wild species, several generations of backcrossing allowed extraction of a single favourable  
86 line. This was used to derive a population with the original recurrent parent and to extract high  
87 and low protein bulks from the derived F<sub>3</sub> population for marker discovery and QTL detection.

88 Selection of CSSLs within a series aims to capture segments supporting genetic  
89 dissection and that optimise donor coverage. Balakrishnan *et al.* (2019) reviewed the breadth  
90 and characteristics of existing CSSL resources reporting that sets were composed of 35-200  
91 lines, typically capturing 90% of donor genome. Tian *et al.* (2006) reported 67% coverage for  
92 wild to cultivated rice compared to near complete (99%) coverage in other rice population (Jie  
93 *et al.*, 2006). In supporting genetic dissection, substitution line phenotypic effects that differ  
94 between an introgression line and the recurrent parent are ascribed to the substituted region  
95 (Rae *et al.*, 1999). To optimise this Wu *et al.* (2006) proposed an additive-dominance model  
96 for accurately determining and ascribing substituted segment effects.

97 In this study we describe the development and characterization of a CSSL series  
98 capturing the genomes of hexaploid wheat's primary progenitor species: tetraploid wild emmer  
99 (*T. turgidum ssp. dicoccoides*; AB genomes) and diploid goat grass (*Ae. tauschii*; D genome).  
100 We genetically characterize the resource using a high-density marker platform to provide  
101 accurate resolution of introgression boundaries. We demonstrate that the series can be used to  
102 associate trait variation from progenitor species to specific genetic regions. The series is  
103 publicly available to provide characterised introgression lines (and associated markers) to  
104 support further trait research and progression into breeding.

105

## 106 **Materials and Methods**

### 107 *Selection of parental material*

108 Two independent backcross-derived CSSL populations were generated to capture the genomes  
109 of the progenitor species *T. turgidum ssp. dicoccoides* (denoted NIAB\_AB) and *Ae. tauschii*  
110 (denoted NIAB\_D). The hexaploid spring wheat 'Paragon' was used as the recurrent parent for  
111 both populations as it has been widely used for genetic studies and the creation of genetic  
112 stocks. For the NIAB\_AB population, the Israeli wild emmer wheat accession TTD-140 was  
113 selected as the donor parent. For the NIAB\_D population, the Armenian *Ae. tauschii* accession  
114 ENT-336 was selected and the synthetic hexaploid line NIAB-SHW041 (created via  
115 resynthesis from a Hoh-501 (AB) x ENT-336 (D) cross) used as the introgression donor.

116 Comparative genetic analysis of 'Paragon', TTD-140 and NIAB-SHW041 used single  
117 nucleotide polymorphism (SNP) marker data generated using the Axiom® Wheat Breeder's  
118 Genotyping Array (Allen *et al.*, 2017). Two datasets were used, the first with A and B genome

119 mapped markers and ‘Paragon’, 24 *T. dicoccoides* (including TTD-140), 12 *T. dicoccum*, 12 *T.*  
120 *durum* accessions and the second using only D genome markers and ‘Paragon’ and 51 primary  
121 synthetic hexaploid wheats (including NIAB-SHW041). Markers were thinned using pairwise  
122 comparisons between SNPs using a Pearson correlation test and a single marker was removed  
123 in comparisons that yielded an absolute value of the correlation coefficient ( $r$ ) greater than  
124 0.75. The final marker number in the A/B and D genome datasets 2,748 and 217, respectively.  
125 The relationships between individuals in each set were compared using principal coordinate  
126 analysis (PCoA) of Euclidean genetic distance matrices computed from the marker data,  
127 implemented in the R package ape (v5.3, Paradis & Schliep 2018).

128

### 129 *Construction of populations*

130 For NIAB\_AB, pollen from the wild emmer wheat donor TTD-140 was used to fertilise  
131 ‘Paragon’ to create a pentaploid F<sub>1</sub> generation. Six F<sub>1</sub> plants were used as the maternal parents  
132 in the creation of the BC<sub>1</sub> generation, where ‘Paragon’ was used to pollinate F<sub>1</sub> plants,  
133 continuing to BC<sub>4</sub>. For NIAB\_D the donor ENT-336 was first crossed to the durum wheat Hoh-  
134 501 to produce a fertile hexaploid synthetic wheat (NIAB-SHW041). The synthetic wheat was  
135 crossed to ‘Paragon’ and the F<sub>1</sub> progeny then backcrossed four times to ‘Paragon’ to derive  
136 BC<sub>4</sub> plants. At each BC generation genomic DNA was extracted from 2-week-old seedlings of  
137 all progenies using a modified Tanksley extraction protocol (Fulton *et al.*, 1995). Marker-  
138 assisted selection (MAS) was used to select individuals carrying heterozygous introgressions  
139 in the F<sub>1</sub> to BC<sub>4</sub> generations and homozygous introgressions in the BC<sub>4</sub>F<sub>2</sub> generation. A  
140 schematic of the crossing scheme is given in **Supplementary Figure S1**. The number of lines  
141 generated, genotyped, and advanced at each generation is summarised in **Supplementary**  
142 **Table S1**.

143 MAS at each BC generation used co-dominant KASP™ markers developed to cover  
144 the TTD-140 and ENT-336 genomes and to allow for differentiation from ‘Paragon’. In  
145 addition to foreground selection, evenly spaced markers on the non-target genomes were used  
146 to allow background selection against the donor. At BC<sub>4</sub>F<sub>4</sub> additional genome-wide SNP  
147 genotyping (using the Axiom® Wheat Breeder's Genotyping Array; Allen *et al.*, 2017) was  
148 used to improve the accuracy of final selection.

149 For the NIAB\_AB population, 191 KASP™ markers (98 A genome; 93 B genome)  
150 distributed at approximately 20-30 cM intervals were selected to screen the BC generations  
151 (**Supplementary Table S2**). An additional set of 50 co-dominant D-genome mapped markers  
152 (1-2 per chromosome arm) was used to facilitate selection against tetraploids and nullisomic

153 aneuploids and amplified a product in D-genome diploids and hexaploids, but not in AB-  
154 genome tetraploids, and gave expected results across nulli-tetrasomic series (**Supplementary**  
155 **Table S3**).

156 Based on graphical genotypes derived from KASP™ marker positions, subsets of BC<sub>1</sub>  
157 lines were manually created. The BC<sub>1</sub> lines were selected to carry multiple but complementary  
158 heterozygous introgressions across the TTD-140 genome. Lines that failed to amplify at loci  
159 targeted by D genome specific KASP™ markers were discarded. For each subsequent cycle of  
160 backcrossing, the same selection criteria were applied. A summary of the number of individuals  
161 created, genotyped, and selected at each crossing generation is given in **Supplementary Table**  
162 **S1**. From each of the 138 selected BC<sub>4</sub>F<sub>1</sub> individuals, 8 BC<sub>4</sub>F<sub>2</sub> seeds were grown and genotyped  
163 (using the above KASP™ marker set; **Supplementary Table S2**) and one individual was  
164 selected based on homozygosity for the marker at the target introgression but minimising  
165 background introgressions (using markers in **Supplementary Table S3**). Eight BC<sub>4</sub>F<sub>3</sub> seeds  
166 from each selected homozygous BC<sub>4</sub>F<sub>2</sub> line were subsequently sown and genotyped with the  
167 KASP™ marker set to identify the target introgression and to ensure progression of  
168 homozygous lines.

169 At the BC<sub>4</sub>F<sub>4</sub> generation, the lines were genotyped using the Axiom® Wheat Breeder's  
170 Genotyping Array (Allen *et al.*, 2017). To derive the final NIAB\_AB population we used 1,444  
171 A-genome and 1,707 B-genome SNPs which were verified to share the same genetic and  
172 physical genome chromosome. Genetic positions were taken from the existing consensus map  
173 (Allen *et al.*, 2017) and physical positions determined using the Basic Local Alignment Search  
174 Tool (BLAST+) command-line applications on the RefSeq v1.0 genome assembly with default  
175 parameters (Camacho *et al.*, 2009, International Wheat Genome Sequencing Consortium  
176 (IWGSC) 2018). Only markers with a single A or B genome physical hit were used.  
177 Introgression selections were made using physical positions and graphical visualisation of  
178 allele variation different from 'Paragon' using Flapjack (v-1.18.06.29, Milne *et al.*, 2010).  
179 Introgressions were visually selected on: (a) coverage across the target genome chromosome,  
180 (b) homozygosity within each introgression and (c) minimal off-target introgressions.

181 For the NIAB\_D population, 60 D-genome KASP™ markers were selected based on  
182 distribution across the D-genome, co-dominance and polymorphism between the recurrent  
183 parent 'Paragon', the tetraploid component of NIAB-SHW041, Hoh-501 and the *Ae. tauschii*  
184 donor ENT-336 (**Supplementary Table S4**). In addition, 66 A- (33) and B-genome (33)  
185 markers were used for background selection against Hoh-501 (**Supplementary Table S5**). The



186 CSSLs were developed using MAS as described for the NIAB\_AB population but with  
187 ‘Paragon’ used as the maternal parent, as summarized in **Supplementary Table S1**.

188 At the BC<sub>4</sub>F<sub>4</sub> generation, lines were genotyped using the Axiom® Wheat Breeder's  
189 Genotyping Array. Using the same approach as for the NIAB\_AB population, 644 SNPs which  
190 shared a genetic and physical D genome chromosome (where markers had only a single  
191 physical D genome hit) were used for the final line selection. Introgression line selections were  
192 based on coverage across each chromosome, maximising homozygosity and minimising off-  
193 target introgressions. Seed of both the NIAB\_AB and NIAB\_D populations is available from  
194 the Germplasm Resources Unit at the John Innes Centre (entries WCSSL0001 to WCSSL0112;  
195 available via <https://www.seedstor.ac.uk/>) and all genotypic data is available from  
196 [www.cerealsdb.uk.net/cerealgenomics/CerealsDB/array\\_info.php](http://www.cerealsdb.uk.net/cerealgenomics/CerealsDB/array_info.php).

197

### 198 *Phenotypic characterisation*

199 The NIAB\_AB population was grown under glasshouse conditions to assess grain yield per  
200 plant and grain characteristics. Two or three replicate plants of each line were grown in an  
201 incomplete block design, surrounded by a ‘Paragon’ border to minimise edge effects. Each  
202 plant was grown in a 1L pot with 16-hour daylength at 22°C and 15°C overnight. At maturity,  
203 all plants plus one ear per plant were photographed, and all plant images are available from:  
204 [https://opendata.earlham.ac.uk/wheat/under\\_license/toronto/Horsnell,Leigh,Bentley,Wright\\_2020\\_NIAB\\_CSSL\\_D\\_genome\\_yield\\_trial\\_H2020/](https://opendata.earlham.ac.uk/wheat/under_license/toronto/Horsnell,Leigh,Bentley,Wright_2020_NIAB_CSSL_D_genome_yield_trial_H2020/). Seed from each plant was hand threshed  
205 and weighed to estimate grain yield per plant. Grains were analysed using a MARVIN seed  
206 analyser (MARViTECH GmbH) to obtain grain dimensions and thousand grain weight (TGW).

207 To assess phenotypic variance in the NIAB\_D CSSLs, three replicates of each line  
208 along with six replicates of the recurrent parent ‘Paragon’ were sown in a randomised yield  
209 (2x6 m harvested area) trial in Hinxton, Cambridge in 2020. The trial was laid out in an  
210 incomplete block design, with 6 plots per block and three complete replicates. Traits assessed  
211 in the field included: grain yield (kg/plot at 85% dry matter content), early ground coverage  
212 using normalised difference vegetation index (NDVI<sup>early</sup>; an average of two measurements  
213 taken between 11:00 and 14:00 GMT on the 15<sup>th</sup> and 21<sup>st</sup> of April 2020 at 2m above the canopy  
214 using a handheld RapidScan CS-45 (Holland Scientific)), plant height (cm from base to tip  
215 (including scurs or awns) of three random plants per plot at maturity), flowering time (days to  
216 growth stage (GS) 61 (start of anthesis) recorded when 50% of the plot was at GS61; Zadoks  
217 *et al.*, 1974). All field trial data is available from Grassroots (Bian *et al.*, 2017):  
218 <https://grassroots.tools/fieldtrial/study/61faaf25c68884365e7bcc34>. Images of each plot were  
219

220 taken to assess glaucosity using a RGB camera (Olympus TG4) at a height of 320cm from the  
221 ground. Images were cropped to eliminate edge distortion with the final 8 Mpix image covering  
222 85% of the plot. Post-processed images for each plot are available here:  
223 [https://opendata.earlham.ac.uk/wheat/under\\_license/toronto/Horsnell,Leigh,Bentley,Wright\\_2020\\_NIAB\\_CSSL\\_D\\_genome\\_yield\\_trial\\_H2020/](https://opendata.earlham.ac.uk/wheat/under_license/toronto/Horsnell,Leigh,Bentley,Wright_2020_NIAB_CSSL_D_genome_yield_trial_H2020/). Post-harvest yield component traits were  
225 assessed on ten replicate ears per plot (collected at random) including ear length (cm from base  
226 to tip of the ear, not including scurs or awns) and spikelet number. Each of the 10 ears was  
227 weighed to determine ear weight, threshed individually and grains analysed using a MARVIN  
228 seed analyser (MARViTECH GmbH) to determine seed number, thousand grain weight  
229 (TGW) and grain dimensions (length, width).

230

### 231 *Phenotypic analysis*

232 For both the NIAB\_AB glasshouse and NIAB\_D field trial, analysis was conducted in R v4.0.3  
233 (R Core Team, 2020). Each trial included the final CSSLs selected to form the graphical  
234 genotype as well as a proportion of CSSLs that were not selected in the final population but  
235 carried introgressions. The NIAB\_AB glasshouse trial analysis included 146 replicated CSSL  
236 individuals. In the NIAB\_D field trial analysis there were 33 replicated CSSLs. For each trait,  
237 variance between replicates and population distributions were plotted and visually inspected to  
238 remove outliers. In the NIAB\_D field trial, 10 ears were harvested per plot as technical  
239 replicates for measurements on ear and seed characteristics. The ears were measured separately  
240 and variance within a plot was then inspected to aid in outlier removal. The technical replicates  
241 were then averaged to form plot means for the analysis.

242 Mixed linear effect models were constructed with restricted maximum likelihood  
243 (REML) using the R packages lme4 (Bates *et al.*, 2015) and lmerTest (Kuznetsova *et al.*, 2017).  
244 Genotype was treated as a fixed factor and the trial design components including ‘replicate’  
245 and ‘block’ were tested within each model as random factors. Due to visual patterns in model  
246 residuals, in addition to the direction of phenotypic assessment and application of agronomic  
247 inputs, the trial layout components ‘column’ in the NIAB\_D and ‘row’ in the NIAB\_AB  
248 glasshouse trial were included as random factors. Final model selection was based on Akaike  
249 Information Criterion (AIC) and (exact) restricted likelihood ratio tests implemented through  
250 the R package RLRsim (Scheipl *et al.*, 2008). In each model, the significance of the genotypic  
251 effect was estimated using ANOVA with Satterthwaite’s degrees of freedom method,  
252 implemented through lmerTest. Generalised heritability ( $H^2$ ) was estimated using genotypic  
253 best linear unbiased predictors (BLUPs) and the Cullis *et al.* (2006) model, using the R script



254 developed by Schmidt *et al.* (2019). Ranked bar plots, including only the final selected CSSLs,  
255 were created for grain yield (NIAB\_D trial), seed width (NIAB\_D trial) and seed length  
256 (NIAB\_AB trial). The package emmeans (Lenth, 2020) was used to complete pairwise  
257 comparisons of all BLUEs for these traits and a false discovery rate (FDR) correction was used  
258 to adjust *P* values for multiple testing. Finally, the package predictmeans (Luo *et al.*, 2020)  
259 was used to inspect the residuals from final models and to extract the BLUEs for examining  
260 variation across all traits.

261

### 262 *Introgression-trait association*

263 Categorical traits were assessed in each CSSL population to demonstrate the use of the resource  
264 for detecting introgression-trait association. In NIAB\_AB this used a major known locus linked  
265 to awn presence and in NIAB\_D to a putative marker association with flag leaf glaucousness.  
266 Awn presence was scored in the NIAB\_AB glasshouse trial and graphical genotypes were  
267 inspected to detect introgressions from the awned donor TTD-140 overlapping with regions  
268 where major awn inhibitors have previously been mapped. Huang *et al.* (2020) characterised  
269 and identified the *BI* locus as a C2H2 zinc finger encoding gene that corresponds to a coding  
270 region on chromosome 5A (698,528,636 to 698,529,001bp; IWGSC 2018). This region was  
271 taken as the physical location of the gene for the introgression-trait association.

272 To demonstrate that CSSLs can also be used to dissect the genetic basis of a less well  
273 characterised association, ear, stem, and leaf glaucousness was scored using visual assessment  
274 and RGB images in the NIAB\_D field trial. This identified a subset of individuals that shared  
275 the non-glaucous phenotype, and these were assessed for common introgression regions. A  
276 previous study (Würschum *et al.*, 2020a) detected a putative marker-trait association linked to  
277 flag leaf glaucousness mapped to 2D (~2.9 Mb) and the ability of the series to validate this  
278 interval was assessed via introgression-trait association. Off target regions were also inspected  
279 to confirm that the subset shared no other common introgressions. Once each introgression-  
280 trait association was identified, schematics using graphical genotype selections were formed  
281 for each association and a SNP cluster plot was extracted from Axiom Analysis Suite (Thermo  
282 Fisher Scientific) that confirmed the CSSL region segregating within the introgressions of  
283 interest. For both populations, markers that were excluded or dropped during the QC were  
284 inspected visually to improve resolution of introgression boundaries.

285

## 286 **Results**

### 287 *Genetic relationships between parents*

288 The genetic relationships between 48 tetraploid wheat accessions and 51 D genome donors (as  
289 novel SHWs) were compared based on Euclidean genetic distance and plotted through PCoA  
290 (**Supplementary Figure S2**). TTD-140, the tetraploid donor of the NIAB\_AB population  
291 clustered with most of the *T. dicoccoides* lines, though the *T. dicoccoides* accessions were  
292 shown to contain significant diverse (**Supplementary Figure S2A**). The main cluster of *T.*  
293 *dicoccoides* was separate from the cultivated wheats by PCoA1, which explained 12% of the  
294 variation. The domesticated wheats, including accessions of *T. durum*, *T. dicoccum* and  
295 ‘Paragon’, all clustered above zero on PCoA1. These cultivated groups were separated by the  
296 second axis which explained 9% of the variation.

297 The synthetic donor used for the NIAB\_D population (NIAB-SHW041) clustered  
298 closely with recurrent parent ‘Paragon’ on the first PCoA axis (**Supplementary Figure S2B**),  
299 where there was a distinct group of primary synthetics that clustered separately from the rest  
300 of the material towards the right of the plot (slightly above 5 on PCoA1). PCoA1 accounted  
301 for 20% of the variation compared to 12% PCoA2. However, within the lineage shared by  
302 NIAB-SHW041 and ‘Paragon’, the two lines do not appear closely related, which is supported  
303 by their separation on PCoA2 in **Supplementary Figure S2B**.

304

#### 305 *Selection of introgression lines based on graphical genotypes*

306 Final lines were selected based on graphical genotypes from the BC<sub>4</sub>F<sub>4</sub> (**Supplementary Table**  
307 **S1**). Two different sets of SNP markers were used for line selection in NIAB\_AB: 1,444  
308 markers with physical locations on the A genome and 1,707 markers with physical positions  
309 on the B genome. From these data sets, 44 genotypes were identified that had A genome  
310 introgressions from TTD-140 (**Figure 1A**). Using the B genome data set, 33 genotypes were  
311 identified with introgressions covering the B genome (**Figure 1B**). These 77 selections  
312 originated from 62 unique NIAB\_AB individuals with some genotypes selected for  
313 introgressions at multiple loci. For example, NIAB\_AB 1A.04 and 5A.05 represent the same  
314 unique individual but are included twice to represent distinct target introgressions. Using the  
315 NIAB\_D population and a D genome marker set of 644 SNPs, 32 genotypes were selected with  
316 introgressions from NIAB-SHW041 (**Figure 1D**). These selections originated from 25 unique  
317 NIAB\_D lines.

318 Individuals were typically selected for a single introgression and genotypes with  
319 multiple introgressions were selected against. However, the majority of BC<sub>4</sub>F<sub>4</sub> individuals  
320 carried small off-target introgressions (**Figure 1**). Within each genome, each selected genotype  
321 contained on average two introgressions (**Figure 1; Supplementary Table S6**). The average

322 length of the introgression ranged from an average of 102 Mb for the B genome to 129 Mb for  
323 the D genome. Off-target introgressions were also present across the different genomes for  
324 each selected line (**Supplementary Figures S3-S5**). Therefore, as an estimate of recurrent  
325 parent background recovery, the percentage of markers with a ‘Paragon’ allele was quantified  
326 for each genotype, using markers with mapped genetic positions on the consensus map (Allen  
327 *et al.*, 2017) and genotypes had 96% average recurrent parent recovery (**Supplementary Table**  
328 **S6**). Several NIAB\_AB lines appeared to have large chromosomal introgressions from TTD-  
329 140 across the D genome (**Supplementary Figures S3, S4**). As the tetraploid donor lacks a D  
330 genome, these lines were likely D-genome aneuploids and alternative (not ‘Paragon’) alleles  
331 were called for markers in that region. The extent of amplification of homeologous loci is not  
332 characterised for the markers described herein, although D genome amplification in tetraploid  
333 accessions indicates that for some markers, priming sites are sufficiently conserved across  
334 genomes to allow amplification.

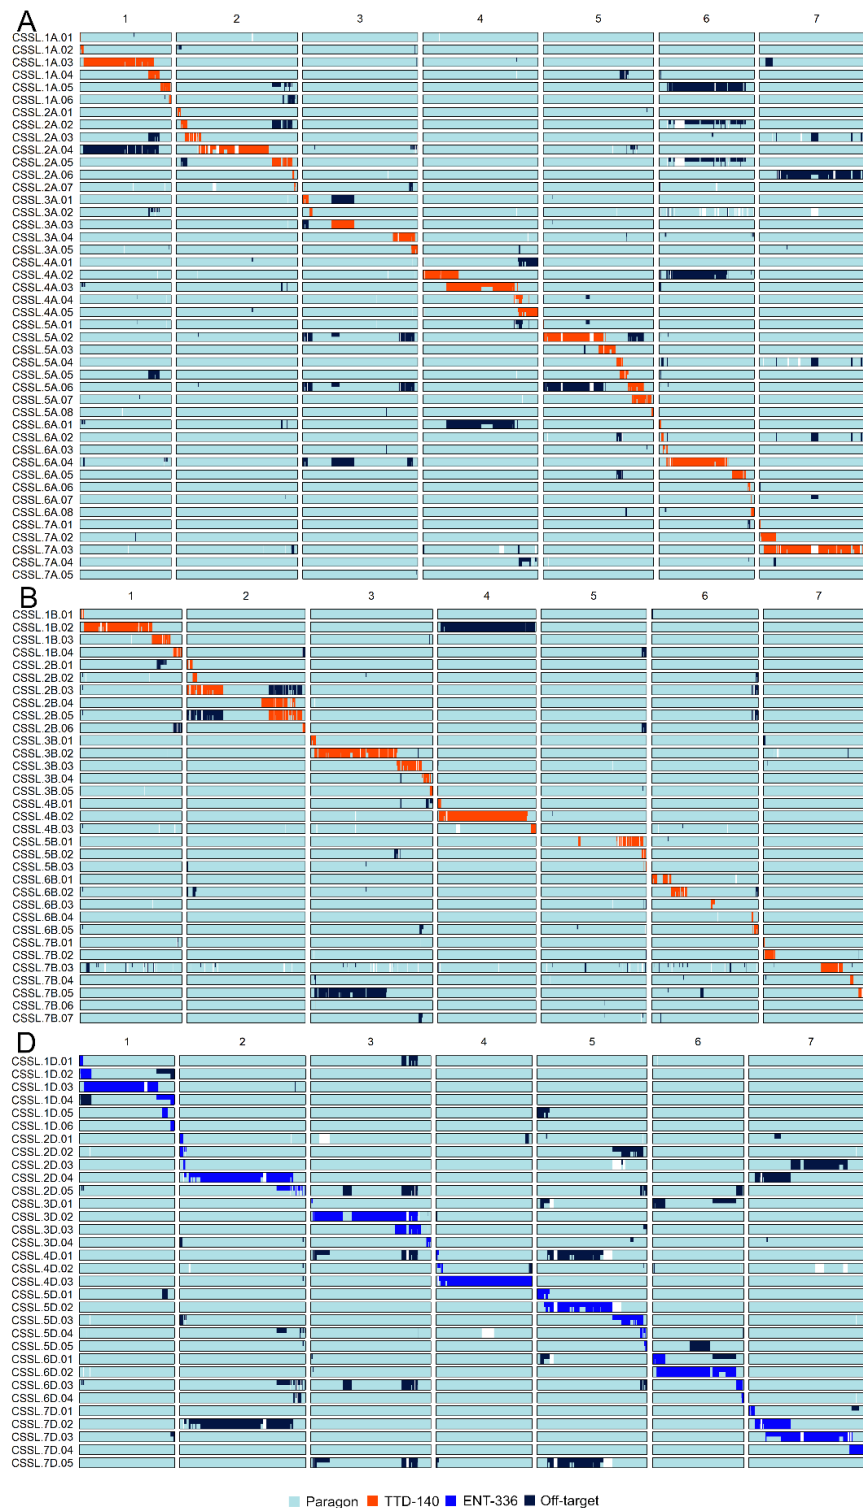

335

336 **Figure 1.** Graphical genotype selections for the A, B and D genome, using the NIAB\_AB and NIAB\_D  
337 populations. A selection of 77 lines was used to form the A and B graphical genotype, originating from 62 unique  
338 NIAB\_AB CSSLs. The light blue colour represents a ‘Paragon’ like genotype, whereas orange represents a TTD-  
339 140 introgression. Off-target introgressions are shown by navy blue. For the D graphical genotype, 32 lines were  
340 selected using 25 unique NIAB\_D CSSLs. The medium blue represents an introgression from the NIAB-SHW041  
341 donor, which was formed using the *Ae. tauschii* ENT-336. The chromosomes are scaled on physical position  
342 (IWGSC 2018) and the length of each chromosome is determined by marker coverage. White spaces show missing

343 data and heterozygous regions are represented by divided colours. The figure was created using the R package  
 344 SelectionTools (v-19.1, [www.uni-giessen.de](http://www.uni-giessen.de)).

345

346 *Phenotypic variation*

347 Variation was observed for every trait measured in comparison to the recurrent parent  
 348 ‘Paragon’. Trait summary statistics from the NIAB\_AB glasshouse and NIAB\_D field trial are  
 349 shown in **Table 1**. For grain length in both trials, and plant height in the NIAB\_D field trial,  
 350 the mean of the CSSL lines was on average higher than ‘Paragon’ (**Table 1**). However, most  
 351 trait means for the CSSLs were lower than the recurrent parent, although individual CSSL lines  
 352 had higher means than ‘Paragon’ for all traits. In the NIAB\_AB glasshouse trial there was a  
 353 43.4% increase in grain yield per plant in the highest yielding CSSL line (compared to  
 354 ‘Paragon’) and in NIAB\_D field trial the highest TGW for a CSSL line gave a 32.5% increase  
 355 over ‘Paragon’. For other traits, such as spikelet number and flowering time in NIAB\_D, there  
 356 were more moderate increases in the maximum CSSL mean compared to ‘Paragon’ (**Table 1**).

357 A significant genotypic effect ( $P < 0.001$ ) was observed for all traits (**Table 1**). In  
 358 NIAB\_D, moderate or high generalised heritability ( $H^2$ ) was observed. The highest  $H^2$  was  
 359 found for grain length ( $H^2 = 0.91$ ) and flowering time, ear length and seed area also showed  
 360 high  $H^2$  (**Table 1**). Estimates of  $H^2$  were lowest for grain yield in the NIAB\_AB glasshouse  
 361 assessment ( $H^2 = 0.39$ ), likely due to measurement on a per plant basis.

362

363 **Table 1.** Summary statistics and results from two replicated trials: NIAB\_AB glasshouse and NIAB\_D field trial.  
 364 Results are taken from all introgressed lines included in both trials and the recurrent parent ‘Paragon’. The best  
 365 linear unbiased estimates (BLUEs) are shown for ‘Paragon’ and the CSSLs that had the maximum and minimum  
 366 BLUE for each trait. The genotypic effect for each trait is shown through ANOVA, using the Satterthwaite's  
 367 degrees of freedom method. Generalized heritability ( $H^2$ ) is shown for every trait. For the NIAB\_D field trial, ear  
 368 and seed characteristics (including seed weight) are shown on a per ear basis, averaged from 10 technical replicates  
 369 per plot.

| Trait                            | Paragon | CSSL<br>min | CSSL<br>mean | CSSL<br>max | Num<br>df | Den<br>df | F    | P      | H <sup>2</sup> |
|----------------------------------|---------|-------------|--------------|-------------|-----------|-----------|------|--------|----------------|
| <b>NIAB_AB glasshouse trial</b>  |         |             |              |             |           |           |      |        |                |
| Grain yield<br>(g/plant)         | 4.38    | 1.06        | 3.74         | 6.28        | 143       | 161.36    | 1.67 | <0.001 | 0.39           |
| Grain length<br>(mm)             | 6.32    | 5.83        | 6.53         | 7.14        | 144       | 204.02    | 3.56 | <0.001 | 0.70           |
| <b>NIAB_D field trial</b>        |         |             |              |             |           |           |      |        |                |
| Grain yield<br>(85% DMC kg/plot) | 6.13    | 4.90        | 5.89         | 6.73        | 33        | 55.85     | 3.07 | <0.001 | 0.68           |

|                                                   |        |        |        |        |    |       |       |        |      |
|---------------------------------------------------|--------|--------|--------|--------|----|-------|-------|--------|------|
| Flowering time<br>(Days from drilling to<br>GS65) | 189.13 | 183.99 | 189.05 | 191.75 | 33 | 54.33 | 8.34  | <0.001 | 0.88 |
| Plant height<br>(cm)                              | 97.65  | 92.31  | 97.84  | 104.68 | 33 | 57.62 | 4.17  | <0.001 | 0.76 |
| NDVI <sup>early</sup><br>(index)                  | 0.64   | 0.52   | 0.59   | 0.67   | 33 | 51.97 | 2.94  | <0.001 | 0.65 |
| Spikelet no.<br>(count)                           | 22.29  | 20.22  | 21.57  | 22.93  | 33 | 59.68 | 6.51  | <0.001 | 0.83 |
| Ear length<br>(cm)                                | 10.57  | 9.51   | 10.33  | 11.83  | 33 | 59.10 | 8.76  | <0.001 | 0.88 |
| Ear weight<br>(g)                                 | 2.95   | 2.38   | 2.77   | 3.51   | 33 | 56.52 | 2.81  | <0.001 | 0.64 |
| Seed no.<br>(no. ear <sup>-1</sup> )              | 58.62  | 42.81  | 56.43  | 63.64  | 33 | 57.46 | 5.88  | <0.001 | 0.82 |
| Seed weight<br>(g ear <sup>-1</sup> )             | 2.39   | 1.91   | 2.21   | 2.89   | 33 | 56.65 | 3.20  | <0.001 | 0.68 |
| TGW<br>(g)                                        | 40.56  | 31.69  | 39.10  | 53.74  | 33 | 59.21 | 7.66  | <0.001 | 0.87 |
| Grain length<br>(mm)                              | 6.63   | 6.35   | 6.70   | 7.33   | 33 | 64.46 | 11.22 | <0.001 | 0.91 |
| Grain width<br>(mm)                               | 3.43   | 3.13   | 3.35   | 3.65   | 33 | 59.68 | 5.09  | <0.001 | 0.80 |
| Grain area<br>(mm <sup>2</sup> )                  | 16.80  | 14.66  | 16.55  | 20.12  | 33 | 60.15 | 8.65  | <0.001 | 0.88 |

370 In the NIAB\_AB glasshouse trial, significant variation was observed for grain length  
371 (**Table 1, Figure 2A**). The majority of the CSSLs had a higher mean than ‘Paragon’; compared  
372 to the recurrent parent there was a 13.0% increase in the CSSL with the maximum grain length  
373 (NIAB\_AB 5A.02/5A.06). For the NIAB\_AB selections, post hoc tests indicated several lines  
374 with grain length significantly different to ‘Paragon’ (**Figure 2A**) and variation for a subset of  
375 lines is shown in **Figure 2B**, clearly demonstrating visual variation. Grain length showed a  
376 positive weak correlation with grain yield per plant ( $r = 0.3$ ,  $P = 0.02$ ; **Figure 2C**). Overall,  
377 there was a significant genotypic effect observed for grain yield per plant (**Table 1**), although  
378 the post hoc tests did not identify any CSSLs that differed significantly to ‘Paragon’ and  
379 measurement on a per plant basis in the glasshouse is the likely cause of the large standard  
380 error associated with the BLUEs (**Figure 2D**).



381

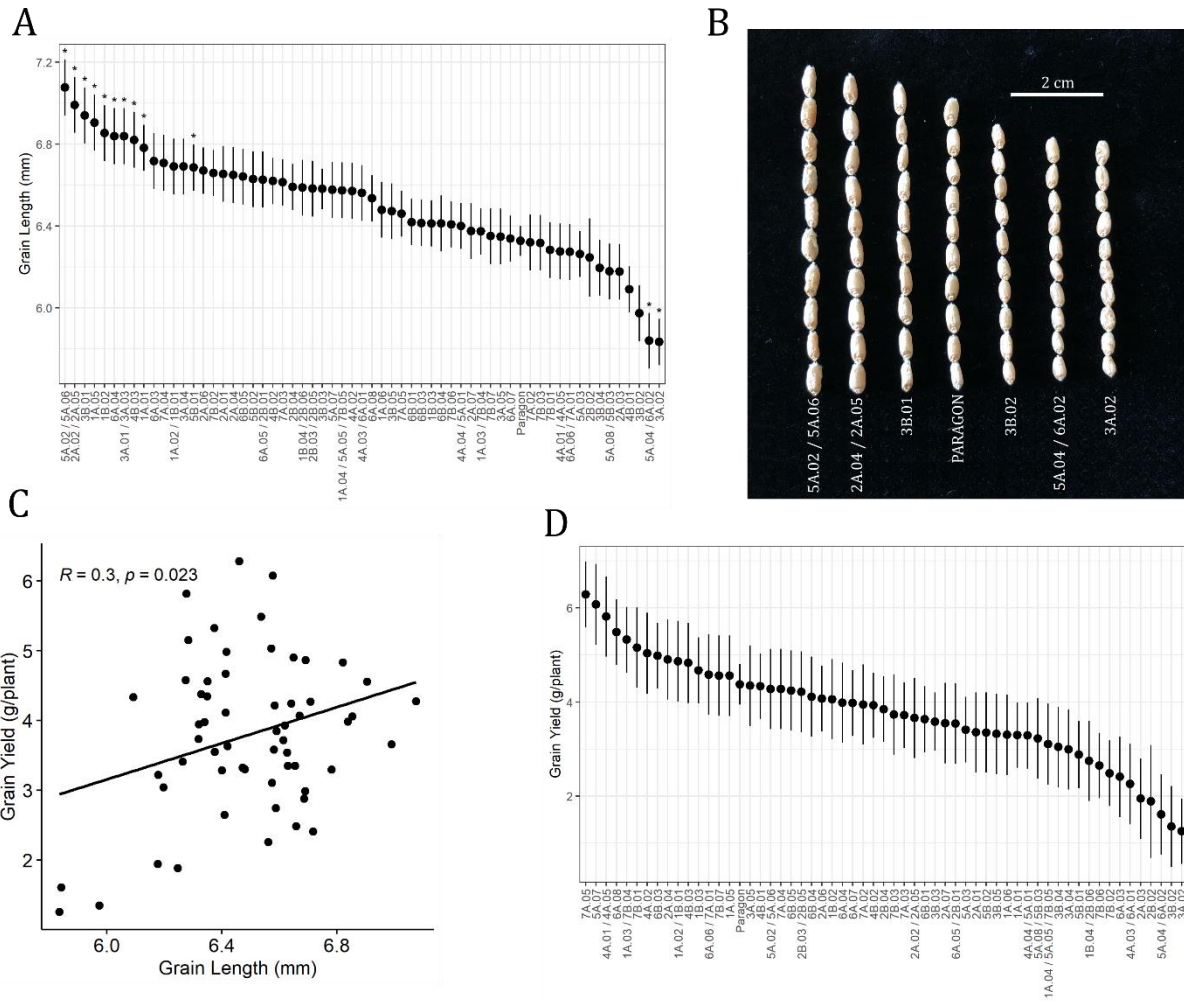

382

383 **Figure 2.** Variation for grain length and yield per plant in the NIAB\_AB glasshouse trial: A) Ranked best linear  
 384 unbiased estimates (BLUEs) for seed length, with the NIAB\_AB lines selected for the graphical genotype and the  
 385 recurrent parent 'Paragon' shown. The asterisks above genotypes indicate where CSSLs were significantly  
 386 different to 'Paragon' ( $P < 0.05$ ). B) Variation in seed length observed with CSSLs with the longest and shortest  
 387 seeds included, and 'Paragon' shown for comparison. C) The relationship between grain length and yield, with  
 388 the Pearson correlation coefficient test statistics overlaid on the plot. D) NIAB\_AB CSSLs and 'Paragon' ranked  
 389 BLUEs for grain yield per plant. Error bars in A and D represent standard error of the BLUEs.

390

391 Several traits showed a positive correlation with grain yield in the NIAB\_D trial  
 392 (**Figure 3A**), of which the positive correlation with grain width was the most significant ( $r =$   
 393  $0.61$ ,  $P < 0.001$ ; **Figure 3A**). Several significant negative trade-offs were also observed with  
 394 flowering time having the most negative correlations with other traits (**Figure 3A**). Earlier  
 395 flowering was negatively associated with ear length, TGW and grain length, width, and area.  
 396 A significant negative relationship was also observed between seed number (per ear) and other  
 397 grain size related traits (including TGW, seed length and area).

398 Grain yield was reduced in the majority of selected CSSLs compared to ‘Paragon’,  
 399 except in five CSSLs (**Figure 3B**). Lines selected for multiple introgressions across the D  
 400 genome gave some of the lowest yield performance. Post-hoc pairwise comparisons showed  
 401 that three of these were significantly lower than ‘Paragon’ (4D.01/7D.05, 2D.02/5D.03 and  
 402 1D.05/5D.01). None of the CSSLs had significantly higher grain yield than ‘Paragon’. Several  
 403 NIAB\_D CSSLs showed significantly different means for grain width compared to ‘Paragon’:  
 404 five CSSLs had a lower predicted mean and a single CSSL had a higher mean (2D.04/7D.02,  
 405 **Figure 3C**). There were clear visual differences in grain width observed across the NIAB\_D  
 406 CSSLs (**Figure 3D**). However, despite wide grain width CSSL.2D.04/7D.02 did not have a  
 407 higher grain yield than ‘Paragon’ (**Figure 3B**).  
 408

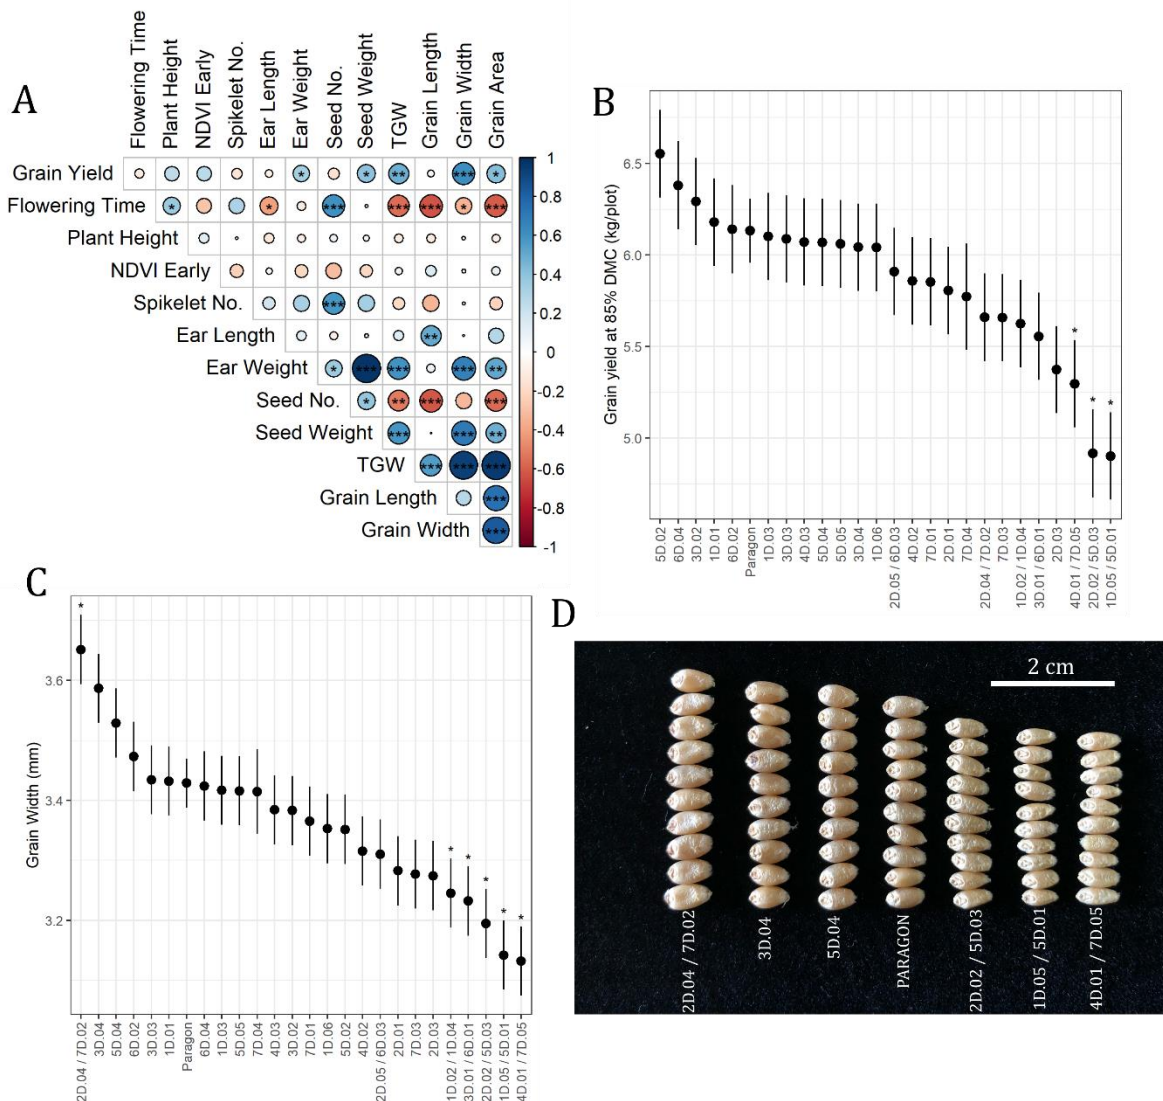

409  
 410 **Figure 3.** Trait correlations and variation for grain yield and grain width in the NIAB\_D field trial: A) a Pearson’s  
 411 correlation matrix calculated using the best linear unbiased estimates (BLUES) from models fitted for each trait.

412 The heat scale bar shows the Pearson correlation coefficient ( $r$ ). The asterisks within the matrix show the  
413 significance threshold taken from the  $P$ -value for each comparison: \*\*\* =  $P < 0.001$ , \*\* =  $P < 0.01$  and \* =  $P < 0.05$   
414 created using R package corrplot (Wei and Simko, 2017). B) Ranked BLUEs for grain yield and C) grain width  
415 from a mixed linear model fitted via lme4 (Bates et al., 2015). Post-hoc pairwise comparisons of the BLUEs used  
416 the package emmeans (Lenth 2020). The asterisks indicate significant difference to ‘Paragon’ ( $P < 0.05$ ). All error  
417 bars shown represent standard error of the predicted means. D) A photograph showing diversity in grain width  
418 using samples taken from plots in the NIAB\_D field trial. The CSSLs with the three highest and lowest grain  
419 widths are shown, with ‘Paragon’ included for comparison.

420

#### 421 *Introgression-trait association and validation*

422 For the introgression-trait analysis, markers that were excluded during the earlier stages of QC  
423 were included to provide further resolution on introgression boundaries. The presence of awns  
424 was detected in a single NIAB\_AB line (5A.07; **Figure 4A**). The CSSLs with neighbouring  
425 introgressions (5A.06 and 5A.08) were non-awned (**Figure 4A**). The awn inhibitor *B1* has been  
426 previously identified (TraesCS5A02G542800, 5A; 698,528,636 to 698,529,001bp; Huang *et*  
427 *al.*, 2020). The introgression from TTD-140 in 5A.07 overlapped this gene (570 Mb to 700  
428 Mb), whereas in 5A.06 and 5A.08 the introgressions were in adjacent regions (**Figure 4B**). The  
429 SNP marker AX-94504627 had a physical location (698,003,176 bp) close to the *B1* locus. The  
430 SNP cluster plot extracted from the Axiom Analysis Suite (Thermo Fisher Scientific) showed  
431 that the only CSSL to carry the TTD-140 allele at this location was 5A.07. As shown in **Figure**  
432 **1**, NIAB\_AB\_5A.07 exhibits few off target introgressions on other chromosomes. No  
433 introgressions were observed in the regions harbouring the other reported awn inhibitors  
434 (Hooded locus (*Hd*)) on 4A and the awn inhibitor (*Tipped 2*) B2 on 6B (Mcintosh *et al.*, 2013).  
435

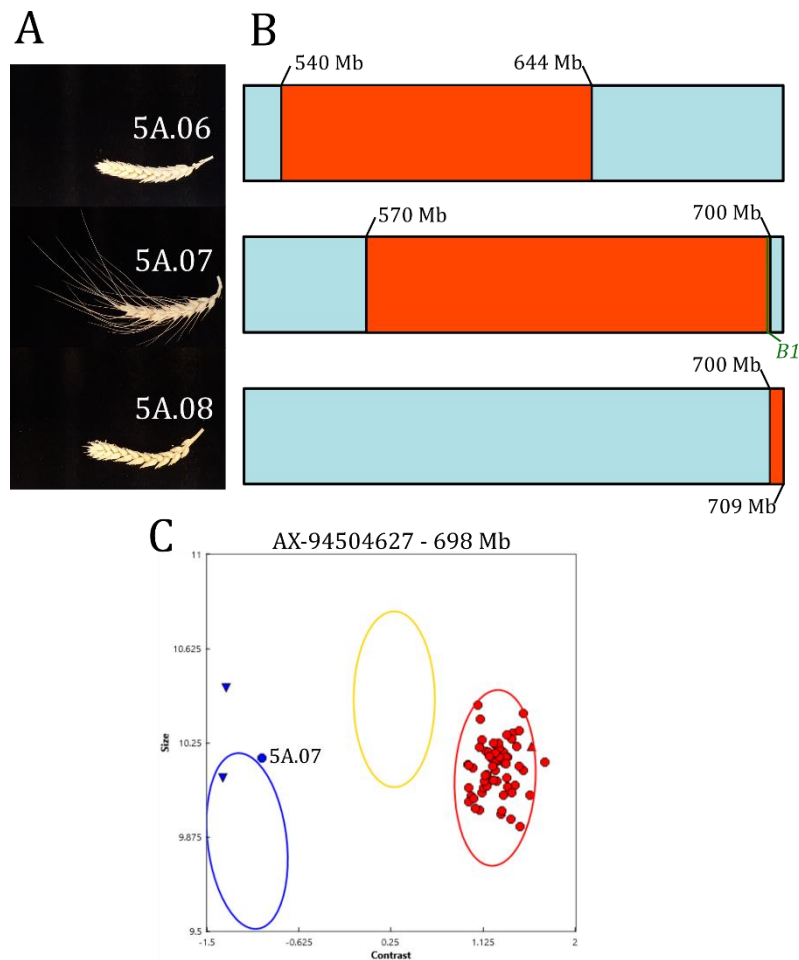

436

437 **Figure 4.** Introgression-trait association using the NIAB\_AB population. A) Ears from the NIAB\_AB glasshouse  
438 trial, showing the single awned CSSL (5A.07). B) The awned CSSL had an introgression from TTD-140 on 5A  
439 that extended over the *B1* awn inhibitor locus (Huang *et al.*, 2020) and awnless CSSLs 5A.06 and 5A.08 did not  
440 have an introgression in this region. A TTD-140 introgression is represented by the colour orange, light blue  
441 represents a ‘Paragon’ genotype. C) A genotyping plot taken from Axiom Analysis Suite (Thermo Fisher  
442 Scientific) for a SNP close to the gene (AX-94504627; 698,003,176 bp) showing CSSLs from the AB graphical  
443 genotype (circular points), two TTD-140 replicates (inverted triangle points) and ‘Paragon’ (a single triangle  
444 point). The only line to share the TTD-140 allele (blue) is CSSL.5A.07. Physical positions are in mega base pairs  
445 (Mb) and were taken from IWGSC (2018).

446

447 Three NIAB\_D CSSLs displayed non-glaucous ear, stem and leaf phenotypes based on  
448 visual and RGB image assessment: 2D.01, 2D.02 and 3D.04. The CSSLs 2D.01 and 2D.02  
449 were selected for NIAB-SHW041 introgressions at the start of 2D (**Figure 5A**), while 3D.04  
450 was selected for a 3D introgression. However, 3D.04 also carried an off-target introgression at  
451 the start of 2D, from 1.6 to 13.7 Mb (**Figure 1**). The CSSL lines 2D.01 and 2D.02 carried an  
452 introgression on 2D from 2.7 to 17.6 Mb and 1.6 to 17.6 Mb, respectively. Additionally, 2D.02  
453 had a downstream heterozygous introgression starting at around 19.7 Mb (**Figure 5A**). The

454 CSSL 2D.03 did not share the non-glaucous phenotype, which is visible in the RGB canopy  
455 photographs of field plots for these genotypes (**Figure 5B**). The line 2D.03 had a homozygous  
456 introgression from 19.6 to 29.2 Mb. The previously identified putative marker-trait association  
457 with flag leaf glaucousness was based on a marker located at 2.9 Mb on 2D and hypothesized  
458 to be *Iw2* (Würschum *et al.*, 2020a), the D-genome paralog of *INHIBITOR of WAX1* (*Iw1*;  
459 identified by Huang *et al.*, 2017). All three NIAB\_D lines that were non-glaucous in the  
460 graphical genotype carried an introgression overlapping this region, which can be observed for  
461 2D.01 and 2D.02 in **Figure 5A**. A SNP marker located at 5.1 Mb also confirmed that the three  
462 non-glaucous CSSLs did not possess the ‘Paragon’ allele close to the marker-trait association  
463 (**Figure 5C**). The introgressions in these lines at the start of 2D were typically homozygous  
464 (**Figure 1**). However, the genotype calls at AX-94815994 are heterozygous (**Figure 5C**). It is  
465 likely that the calls for the lines were homozygous for the ENT-336 (D-genome) allele but  
466 differences in ploidy impacting SNP calling between the CSSLs and the *Ae. tauschii* donor has  
467 separated the cluster. Whole genome graphical genotypes were inspected visually and the  
468 CSSLs 2D.01, 2D.02 and 3D.04 did not share any other overlapping introgressions.

469

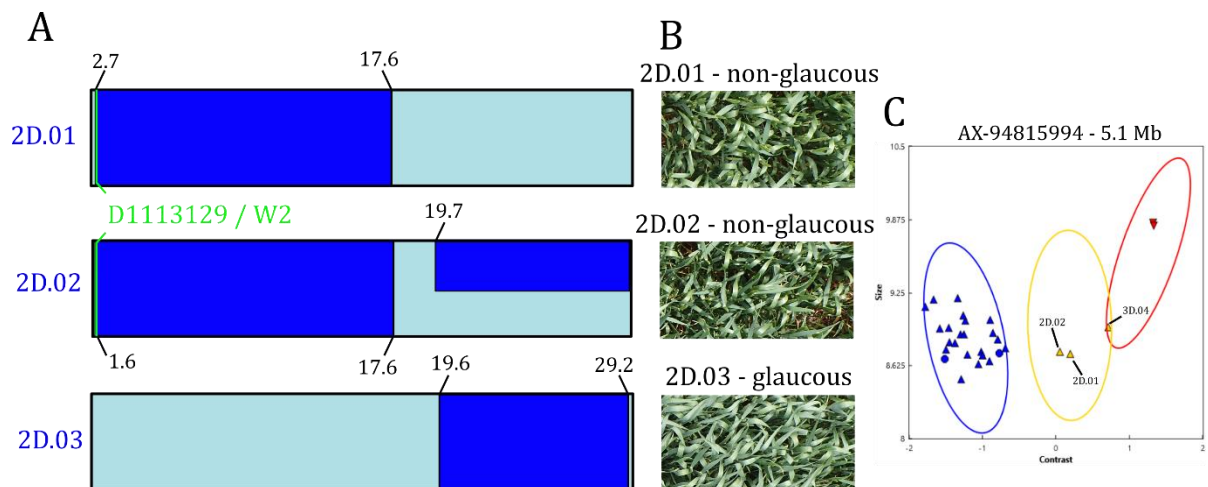

470

471

472 **Figure 5.** A) Schematic showing regions of chromosome 2D on three NIAB\_D genome lines; light blue indicates  
473 a ‘Paragon’ genotype and dark blue indicates an introgression from NIAB-SHW041. The location of a putative  
474 QTL (linked to the marker D1113129) proposed to correspond to a known locus for wax production *Iw2*  
475 (Würschum *et al.*, 2020a) is overlaid on the plot. B). Canopy photos from the NIAB\_D field trial show 2D.01  
476 and 2D.02 were non-glaucous. C) A plot extracted from the genotyping software Axiom Analysis Suite (Thermo  
477 Fisher Scientific) for a SNP (AX-94815994; 5.1 Mb on 2D) that shows CSSLs genotypes from the D graphical  
478 genotype (triangle points), two of the D genome donor ENT-336 replicates (inverted triangle points) and ‘Paragon  
479 circular points). The three CSSLs that were non-glaucous in the NIAB\_D field trial are labelled. Physical positions  
480 are shown in mega base pairs (Mb) taken from (IWGSC 2018).



## 481 Discussion

482 We report the creation of a genetic resource for detecting and exploiting wheat progenitor  
483 variation. Publicly available pure seed, phenotyping and genotyping data support use as  
484 introgression donors and/or near-isogenic lines. The introgressions are genetically tractable, of  
485 reasonable size for forward use and have low off-target segments. This builds on early work to  
486 develop wheat resources for gene localisation and characterisation (Sears 1953 & 1954) and  
487 genetic mapping (Zemetra *et al.*, 1986). Since this time numerous forward and reverse wheat  
488 genetic resources have been developed and the reported wheat CSSL series adds a further  
489 precision resource for exploiting progenitor diversity.

490 The NIAB\_AB and NIAB\_D series were created using backcrossing and MAS  
491 followed by high-density genotyping to facilitate progenitor segment introgression with low  
492 off-target effects. This approach is relatively time and cost intensive. Different methods of  
493 population construction have been proposed, including those with a lower marker requirement  
494 (e.g. Bian *et al.* (2010) used 8 informative markers at BC<sub>3</sub>F<sub>4</sub> followed by pooled genotyping to  
495 extract individuals with small donor segments). This reduced genotyping approach is an  
496 alternative, low-cost approach to support CSSL development although larger numbers of  
497 individuals need to be progressed through backcrossing. Future development of CSSL series is  
498 likely to benefit from the reducing costs of genotyping, allowing more intensive screening and  
499 enhancing both accuracy of donor introgression and background recovery. The reducing cost  
500 of whole genome skim sequencing is also likely to allow higher resolution of introgression  
501 segments.

502 In both the NIAB\_AB and NIAB\_D series, we detected significant trait variation and  
503 transgressive segregation compared to 'Paragon'. Grain size and shape are largely independent  
504 traits and we observed strong variation for grain length and width. Grain length of ancestral  
505 wheat has been shown to be generally higher than in elite bread wheat (Gegas *et al.*, 2010) and  
506 selection of alleles that confer increased grain length could increase grain size. Brinton *et al.*  
507 (2017) identified a significant QTL for TGW on chromosome 5A (*Qtgw-cb.5A*) demonstrating  
508 that the increase in grain area (driving TGW) was predominantly conferred by an increase in  
509 grain length. Yang *et al.* (2019) also identified a novel allele associated with increased grain  
510 length on 5AL (cloning *TaGL3-5A-G*). This allele, found in ancestral wheats, represents a  
511 breeding target, particularly if it could be pyramided in combination with favourable alleles for  
512 grain width (e.g. *TaGW2*; Simmonds *et al.*, 2016) and grain size (*TaGS5-3A*; Ma *et al.*, 2015).  
513 In the NIAB\_AB population, there was a significant positive effect of grain yield per plant  
514 correlated with grain length. This identified individual CSSL lines with introgressions



515 associated with increased grain length which are effectively near-isogenic lines for the TTD-  
516 140 segment. The introgression in the lines with the greatest increase in grain length is in the  
517 same region as *TaGL3-5A* (Yang *et al.*, 2019) and future work could establish whether it  
518 contains the favourable allele described by Yang *et al.* (2019). These lines could be field tested  
519 to validate the effect, and the segments transferred to additional elite backgrounds to test  
520 stability. In addition, the extreme positive and negative (compared to ‘Paragon’) lines could be  
521 used in a bulk-segregant genotyping approach (e.g. based on exome sequencing; Martinez *et*  
522 *al.*, 2020 or RNA-seq; Zhu *et al.*, 2020) to determine the specific grain length controllers.

523 For the NIAB\_D population, significant trait variation and high trait heritabilities were  
524 observed. The significant genotypic effects, despite the high recovery of ‘Paragon’  
525 background, indicate effective capture (and contribution) of functional variation from the *Ae.*  
526 *tauschii* donor ENT-336. Variation was observed for grain yield although was only significant  
527 for CSSLs with yields lower than ‘Paragon’. Although not statistically significant, five CSSLs  
528 yielded higher than ‘Paragon’. Further testing through multi-site trials could establish if there  
529 is a significant yield effect associated with these CSSLs. Grain width was highly correlated  
530 with yield. This allowed identification of CSSLs with positive and negative effects for grain  
531 width which are available as near-isogenic lines, introgression segment donors and for further  
532 genetic characterisation, as above. Grain width has been well characterised in hexaploid wheat  
533 (Simmonds *et al.*, 2016) and alternative alleles for *TaGW2* can increase grain width and  
534 therefore grain weight, though phenotypes may be subtle due to allele dosage effects. Previous  
535 GWAS analysis of *Ae. tauschii* collections have identified numerous QTL for grain  
536 characteristics conferred by genetic effects on multiple chromosomes (Arora *et al.*, 2017; Zhao  
537 *et al.*, 2021). The further development of markers for the regions underlying these QTLs will  
538 facilitate the validation of allelic effects and potential use for breeding.

539 In addition to identification of lines with positive and negative introgression effects,  
540 specific trait-introgression effects could be assessed based on physical locations of the  
541 segments. Although the series can’t be used directly for mapping *per se* due to the low power  
542 of detection it can be used to associate introgressions with phenotypes of interest. This is useful  
543 to validate previously observed effects as well as being a starting point for fine mapping. Here,  
544 our definition of introgression segment boundaries is limited to the coverage of Axiom® Wheat  
545 Breeder’s Genotyping Array (Allen *et al.*, 2017) but further genotyping would allow higher  
546 resolution and definition of boundaries and allow full automation of the process (array data  
547 requires manual curation below software quality thresholds). However, the current resolution  
548 is likely to be sufficient for transfer of segments via MAS.

549 The recurrent parent ‘Paragon’ carries the *BI* awn inhibition locus. Using the  
550 NIAB\_AB population, and through replacement of the region with the wild type (recessive)  
551 progenitor allele via introgression we confirmed the location of the locus. This was near the  
552 edge of the introgression boundary but could be reliably detected and linked to the phenotype.  
553 The *Tipped 1 (BI)* mutant is one of the three major loci linked to awn presence in wheat  
554 (Watkins and Ellerton, 1940; Sourdille *et al.*, 2002; Yoshioka *et al.*, 2017) and has been  
555 identified as an important determinant of awn development (Mackay *et al.*, 2014; Würschum  
556 *et al.*, 2020b). The *BI* locus has been fine mapped in multiple studies to 5AL (DeWitt *et al.*,  
557 2020; Huang *et al.*, 2020; Niu *et al.*, 2020; Wang *et al.*, 2020; Würschum *et al.*, 2020b). Awn  
558 presence and the *BI* locus have been recently linked to an offset in the negative association  
559 between grain yield and protein content (Scott *et al.*, 2021). The detection of the awn inhibitor  
560 segment demonstrates the use of the resource for categorical traits and could be used to further  
561 understand awn and linked-awn trait haplotype contributions from *T. diccoides* and expedite  
562 their transfer to breeding. CSSLs with and without awns could also be used to further  
563 understand the mechanisms of the recently reported trade-offs between awns, quality, and  
564 nutritional traits (Scott *et al.*, 2021).

565 In the NIAB\_D population we demonstrate the use of trait-introgression association to  
566 validate a putative association with a categorical trait contributed by the progenitor *Ae. tauschii*.  
567 This used a step-by-step statistical approach enabling validation of a marker-trait association  
568 for glaucousness which fell slightly below the significance threshold in Würschum *et al.*  
569 (2020a). Our approach aligned the glaucous phenotype of the CSSL introgression segment with  
570 the physical position of the peak marker reported by Würschum *et al.* (2020a). In addition to  
571 confirming the genetic effect, this provides a 35K Axiom marker to facilitate MAS and tracking  
572 in breeding, adding to the previously identified DArTseq peak marker from Würschum *et al.*  
573 (2020a). This is likely to be advantageous given the relative ease of conversion of array probes  
574 compared to sequence-based probe conversion (Burrige *et al.*, 2018).

575 Here we report the development, characterization, and initial testing of a CSSL wheat  
576 series as a tractable genetic resource adding to the existing portfolio of functional genomics  
577 resources for wheat improvement. The use of ‘Paragon’ as a genetic background complements  
578 other available wheat resources including the A.E. Watkins hexaploid wheat nested association  
579 mapping panel, and EMS and  $\gamma$  mutant populations (Wingen *et al.*, 2017), QTL datasets  
580 (Przewieslik-Allen *et al.*, 2021), and publicly available synthetic hexaploid wheat populations  
581 (Adamski *et al.*, 2020). Further work is required to reduce off-target introgressions and to split  
582 multiple introgression lines into discreet single-introgression lines. The application of higher

583 density markers and/or sequencing will support further precision in defining introgression  
584 boundaries. The extreme phenotypic lines can be further validated as near isogenic lines and  
585 used as donor lines for transfer of introgressions to additional elite parents for use in breeding.  
586 The NIAB\_AB and NIAB\_D lines can also be intercrossed to create favourable introgression  
587 complements (e.g. grain length and grain width) for further testing and development of targeted  
588 multi-introgression lines for specific traits of interest. Overall, the resource reported here  
589 increases access to wheat genomic resources for research and breeding improvements.

590

### 591 **Acknowledgements**

592 Development of the CSSL resource was supported by the UK's Biotechnology and Biological  
593 Sciences Research Council via the Wheat Improvement Strategic Program (BB/I002561/1) and  
594 Designing Future Wheat (BB/P016855/1). We thank Professor Andy Greenland, Dr Nicolas  
595 Gosman and Dr Keith Gardner for their contribution and insights into the development of the  
596 resource. We thank Michael Scott for supplying the BLAST+ output for the SNP markers and  
597 Dr Rob Davey for facilitating trial and image uploads to Grassroots.

598

### 599 **Conflict of interest**

600 The authors declare no conflict of interest.

601

### 602 **Author contributions**

603 P.H., C.U., K.J.E. and A.R.B. conceived the project; R.H., F.J.L, T.I.C.W., A.R.B designed  
604 experiments; R.H., F.J.L, A.J.B., A.L., A.M.P.-A. performed the experiments; F.J.L, T.I.C.W.,  
605 P.H. and A.R.B analysed experiments, R.H., F.J.L, T.I.C.W. and A.R.B wrote the manuscript  
606 with inputs from all other authors.

607

### 608 **Data availability**

609 Seed of the germplasm reported here is directly available from the Germplasm Resources Unit  
610 at the John Innes Centre (via <https://www.seedstor.ac.uk/>), including the parental line  
611 'Paragon' (WCSSL0001), donor lines TTD-140 (WCSSL0002) and NIAB-SHW041  
612 (WCSSL0003) and for the NIAB\_AB (WCSSL0004 to WCSSL0080) and NIAB\_D  
613 (WCSSL0081 to WCSSL0112) populations.

614 The Axiom® Wheat Breeder's Genotyping Array data is available for direct download for each  
615 of the three genomes here:

616 [https://www.cerealsdb.uk.net/cerealgenomics/CerealsDB/genotyping\\_data/NIAB\\_CSSL\\_Age](https://www.cerealsdb.uk.net/cerealgenomics/CerealsDB/genotyping_data/NIAB_CSSL_Age)  
617 [nome.csv](#)

618 [https://www.cerealsdb.uk.net/cerealgenomics/CerealsDB/genotyping\\_data/NIAB\\_CSSL\\_Bge](https://www.cerealsdb.uk.net/cerealgenomics/CerealsDB/genotyping_data/NIAB_CSSL_Bge)  
619 [nome.csv](#)

620 [https://www.cerealsdb.uk.net/cerealgenomics/CerealsDB/genotyping\\_data/NIAB\\_CSSL\\_Dge](https://www.cerealsdb.uk.net/cerealgenomics/CerealsDB/genotyping_data/NIAB_CSSL_Dge)  
621 [nome.csv](#)

622 Plant images from the NIAB\_AB glasshouse trial are available from:  
623 [https://opendata.earlham.ac.uk/wheat/under\\_license/toronto/Horsnell,Leigh,Bentley,Wright](https://opendata.earlham.ac.uk/wheat/under_license/toronto/Horsnell,Leigh,Bentley,Wright)  
624 [2020 NIAB\\_CSSL\\_D\\_genome\\_yield\\_trial\\_H2020/](#)

625 Plot images from the NIAB\_D field trial are available from:  
626 [https://opendata.earlham.ac.uk/wheat/under\\_license/toronto/Horsnell,Leigh,Bentley,Wright](https://opendata.earlham.ac.uk/wheat/under_license/toronto/Horsnell,Leigh,Bentley,Wright)  
627 [2020 NIAB\\_CSSL\\_D\\_genome\\_yield\\_trial\\_H2020/](#)

628 Data from the NIAB\_D field trial are available from:  
629 <https://grassroots.tools/fieldtrial/study/61faaf25c68884365e7bcc34>

630

## 631 **References**

632 Adamski NM, Borrill P, Brinton J, *et al*, (2020) A roadmap for gene functional characterisation  
633 in crops with large genomes: Lessons from polyploid wheat. *eLife* 9:e55646  
634 doi:10.7554/eLife.55646

635

636 Ali ML, Sanchez PL, Yu S *et al*. (2010) Chromosome Segment Substitution Lines: a powerful  
637 tool for the introgression of valuable genes from *Oryza* wild species into cultivated rice (*O.*  
638 *sativa*). *Rice* 3: 218–234. <https://doi.org/10.1007/s12284-010-9058-3>

639

640 Allen AM, Winfield MO, Burridge AJ, *et al* (2017) Characterization of a Wheat Breeders'  
641 Array suitable for high-throughput SNP genotyping of global accessions of hexaploid bread  
642 wheat (*Triticum aestivum*). *Plant Biotechnology Journal* 15: 390–401.  
643 <https://doi.org/10.1111/pbi.12635>

644

645 Arora S, Singh N, Kaur S, Bains NS, Uauy C, Poland J, Chhuneja P (2017) Genome-wide  
646 association study of grain architecture in wild wheat *Aegilops tauschii*. *Frontiers in Plant*  
647 *Science* 8: 886.

648

- 649 Balakrishnan D, Surapaneni M, Mesapogu S, Neelamraju S (2019) Development and use of  
650 chromosome segment substitution lines as a genetic resource for crop improvement.  
651 *Theoretical and Applied Genetics* 132: 1-25. doi:10.1007/s00122-018-3219-y  
652
- 653 Basava RK, Hash CT, Mahendrakar MD, Kishor KPB, Satyavathi CT, Kumar S, Singh RB,  
654 Yadav RS, Gupta R, Srivastava RK (2019) Discerning combining ability loci for divergent  
655 environments using chromosome segment substitution lines (CSSLs) in pearl millet. *PLoS*  
656 *ONE* 14: e0218916. <https://doi.org/10.1371/journal.pone.0218916>  
657
- 658 Bates D, Mächler M, Bolker B, Walker S (2015) Fitting linear mixed-effects models using  
659 lme4. *J Stat Softw* 67 <https://doi.org/10.18637/jss.v067.i01>  
660
- 661 Berke TG, Baenziger PS, Morris WR (1992) Chromosomal location of wheat quantitative trait  
662 loci affecting agronomic performance, using reciprocal chromosome substitutions. *Crop*  
663 *Science* 32: 621–627.  
664
- 665 Bian JM, Jiang L, Liu LL, Wei XJ, Xiao YH, Zhang LJ, et al. (2010) Construction of a new set  
666 of rice chromosome segment substitution lines and identification of grain weight and related  
667 traits QTLs. *Breeding Science* 60: 305–13.  
668
- 669 Bian X, Tyrrell S, Davey RP (2017) The Grassroots life science data infrastructure.  
670 <https://grassroots.tools>  
671
- 672 Blanco A, Simeone R, Gadaleta A (2006) Detection of QTLs for grain protein content in durum  
673 wheat. *Theoretical and Applied Genetics* 112: 1195–1204.  
674
- 675 Brinton J, Simmonds J, Minter F, Leverington-Waite M, Snape J, Uauy C (2017) Increased  
676 pericarp cell length underlies a major quantitative trait locus for grain weight in hexaploid  
677 wheat. *New Phytologist* 215: 1026-1038.  
678
- 679 Burrige A, Wilkinson P, Winfield M, Barker G, Przewieslik-Allen S, Coghill J, Waterfall C,  
680 Edwards K (2018) Conversion of array-based single nucleotide polymorphic markers for use  
681 in targeted genotyping by sequencing in hexaploid wheat (*Triticum aestivum*). *Plant*  
682 *Biotechnology Journal* 16: 867-876.

683

684 Camacho C, Coulouris G, Avagyan V, Ma N, Papdopoloulos J, Bealer K, Madden TL (2009)  
685 BLAST+: architecture and applications. *BMC Bioinformatics* 10, 421.  
686 <https://doi.org/10.1186/1471-2105-10-421>

687

688 Chitwood DH, Kumar R, Headland LR, Ranjan A, Covington MF et al. (2013) A quantitative  
689 genetic basis for leaf morphology in a set of precisely defined tomato introgression lines. *Plant*  
690 *Cell* 25: 2465–2481.

691

692 Cox TS (1997) Deepening the wheat gene pool. *Journal of Crop Production* 1: 1-25. doi:  
693 10.1300/J144v01n01\_01.

694

695 Cullis BR, Smith AB, Coombes NE (2006) On the design of early generation variety trials with  
696 correlated data. *Journal of Agricultural Biology and Environmental Statistics* 11: 381-393.  
697 <https://doi.org/10.1198/108571106X15443>.

698

699 DeWitt, N., Guedira, M., Lauer, E., Sarinelli, M., Tyagi, P., Fu, D., et al. (2020) Sequence-  
700 based mapping identifies a candidate transcription repressor underlying awn suppression at the  
701 *BI* locus in wheat. *New Phytologist*, 225, 326–339.

702

703 Eshed Y, Abu-Abied M, Saranga Y Zamir D (1992) *Lycopersicon esculentum* lines containing  
704 small overlapping introgressions from *L. pennellii*. *Theoretical and Applied Genetics* 83:  
705 1027–1034.

706

707 Eshed Y, Zamir D (1994) A genomic library of *Lycopersicon pennellii* in *L. esculentum*: a tool  
708 for fine mapping of genes. *Euphytica* 79: 175–79.

709

710 Eshed Y Zamir D (1995) An introgression line population of *Lycopersicon pennellii* in the  
711 cultivated tomato enables the identification and fine mapping of yield-associated QTL.  
712 *Genetics* 141: 1147–1162.

713

714 Evans LT, Bingham J, Jackson P, Sutherland J (1972) Effect of awns and drought on the supply  
715 of photosynthate and its distribution within wheat ears. *Annals of Applied Biology*, 70, 67–76.

716



- 717 Falke KC, Miedaner T, Frisch M (2009) Selection strategies for the development of rye  
718 introgression libraries. *Theoretical and Applied Genetics* 119: 595–603.  
719
- 720 Feldman M, Millet E (1995) Methodologies for identification, allocation and transfer of  
721 quantitative genes from wild emmer into cultivated wheat. In: Li ZS, Xin ZY (eds) Proceedings  
722 of the 8th international wheat genetics symposium, Beijing, China, pp 19–27.  
723
- 724 Fletcher RS, Mullen JL, Yoder S *et al.* (2013) Development of a next-generation NIL library  
725 in *Arabidopsis thaliana* for dissecting complex traits. *BMC Genomics*. 14: 655.  
726 doi:10.1186/1471-2164-14-655.  
727
- 728 Fonceka D, Tossim HA, Rivallan R, et al. (2012) Construction of chromosome segment  
729 substitution lines in peanut (*Arachis hypogaea* L.) using a wild synthetic and QTL mapping for  
730 plant morphology. *PLoS One* 7: e48642. doi:10.1371/journal.pone.0048642  
731
- 732 Fridman E, Carrari F, Liu Y-S, Fernie AR, Zamir D (2004) Zooming in on a quantitative trait  
733 for tomato yield using interspecific introgressions. *Science* 17: 1786-9.  
734
- 735 Fu YB, Somers DJ (2009) Genome-wide reduction of genetic diversity in wheat breeding. *Crop*  
736 *Science* 49: 61–168.  
737
- 738 Fulop D, Ranjan A, Ofner I, Covington MF, Chitwood DH, West D, Ichihashi Y, Headland L,  
739 Zamir D, Maloof JN, Sinha NR (2016) A new advanced backcross tomato population enables  
740 high resolution leaf QTL mapping and gene identification. *G3: Genes, Genomes, Genetics* 6:  
741 3169-3184.  
742
- 743 Fulton TM, Chunwongse J, Tanksley SD (1995) Microprep protocol for extraction of DNA  
744 from tomato and other herbaceous plants. *Plant Molecular Biology Reporter* 13: 207–209.  
745
- 746 Gaurav K, Arora S, Silva P *et al.* (2021) Population genomic analysis of *Aegilops tauschii*  
747 identifies targets for bread wheat improvement. *Nature Biotechnology*  
748 <https://doi.org/10.1038/s41587-021-01058-4>  
749

- 750 Gegas VC, Nazari A, Griffiths S, Simmonds J, Fish L, Orford S, Sayers L, Doonan JH, Snape  
751 JW (2010) A genetic framework for grain size and shape variation in wheat. *The Plant Cell* 22:  
752 1046–1056,  
753
- 754 Grewal S, Hubbart-Edwards S, Yang C, et al. (2020) Rapid identification of homozygosity and  
755 site of wild relative introgressions in wheat through chromosome-specific KASP genotyping  
756 assays. *Plant Biotechnology Journal* 18: 743-755. doi:10.1111/pbi.13241  
757
- 758 Gross BL, Olsen KM (2010) Genetic perspectives on crop domestication. *Trends in Plant*  
759 *Science* 15: 529–537.  
760
- 761 Gu L, Wei B, Fan R, Jia X, Wang X, Zhang X (2015) Development, identification and  
762 utilization of introgression lines using Chinese endemic and synthetic wheat as donors. *Journal*  
763 *of Integrative Plant Biology* 8: 688–697  
764
- 765 Holtan HEE, Hake S (2003) Quantitative trait locus analysis of leaf dissection in tomato using  
766 *Lycopersicon pennellii* segmental introgression lines. *Genetics* 165: 1541-1550.  
767
- 768 Howell PM, Lydiate DJ, Marshall DF (1996). Towards developing intervarietal substitution  
769 lines in *Brassica napus* using marker-assisted selection. *Genome* 39: 348-358.  
770
- 771 Huang D, Feurtado A, Smith MA, Flatman LK, Koh C, Cutler AJ (2017) Long noncoding  
772 miRNA gene represses wheat  $\beta$ -diketone waxes. *Proceedings of the National Academy of*  
773 *Sciences* 114: E3149-E3158.  
774
- 775 Huang D, Zheng Q, Melchikart T, Bekkaoui Y, Konkin DJF, Kagale S et al. (2020) Dominant  
776 inhibition of awn development by a putative zinc-finger transcriptional repressor expressed at  
777 the *BI* locus in wheat. *New Phytologist*, 225, 340–355.  
778
- 779 International Wheat Genome Sequencing Consortium (IWGSC) (2018) Shifting the limits in  
780 wheat research and breeding using a fully annotated reference genome. *Science*. 17: 361  
781 (6403): eaar7191. doi: 10.1126/science.aa7191.  
782

- 783 Jie C, Bughio H, Chen DZ, Liu G, Zheng K, Zhuang J (2006) Development of chromosomal  
784 segment substitution lines from a backcross recombinant inbred population of interspecific rice  
785 cross. *Rice Science* 13: 15–21.  
786
- 787 Joppa LR, Cantrell RG (1990) Chromosomal location of genes for grain protein content of wild  
788 tetraploid wheat. *Crop Science* 30: 1059-1064.  
789
- 790 Joppa LR, Du C, Hart GE, Hareland GA (1997) Mapping gene(s) for grain protein in tetraploid  
791 wheat (*Triticum turgidum* L.) using a population of recombinant inbred chromosome lines.  
792 *Crop Science* 37: 1586-1589.  
793
- 794 Keurentjes JJB, Bentsink L, Alonso-Blanco C, Hanhart CJ, Vries HB-D, et al. (2007)  
795 Development of a near-isogenic line population of *Arabidopsis thaliana* and comparison of  
796 mapping power with a recombinant inbred line population. *Genetics* 175: 891–905.  
797
- 798 Kishii M (2019) An update of recent use of *Aegilops* species in wheat breeding. *Frontiers in*  
799 *Plant Science* 10:585. doi: 10.3389/fpls.2019.00585  
800
- 801 Kumari BR, Kolesnikova-Allen MA, Hash CT, Senthilvel S, Nepolean T, KaviKishor PB,  
802 Riera-Lizarazu O, Witcombe JR, Srivastava RK (2014) Development of a set of chromosome  
803 segment substitution lines in pearl millet [*Pennisetum glaucum* (L.) R. Br.]. *Crop Science* 54:  
804 2175–2182.  
805
- 806 Kuspira J, Unrau J (1957) Genetic analysis of certain characters in common wheat using whole  
807 chromosome substitution lines. *Canadian Journal of Plant Sciences* 37: 300-326.  
808
- 809 Kuznetsova A, Brockhoff PB, Christensen RHB (2017) lmerTest package: tests in linear mixed  
810 effects models. *Journal of Statistics Software* 82: <https://doi.org/10.18637/jss.v082.i13>  
811
- 812 Law CN (1966) Biometrical analysis using chromosome substitutions within a species. P59-85  
813 In R. Riley and KR Lewis (ed.) *Chromosome manipulations in plant genetics*. Plenum Press,  
814 New York.  
815

- 816 Leigh FJ, Wright TIC, Horsnell RA, Dyer S, Bentley AR (2022) Progenitor species hold  
817 untapped diversity for potential climate-responsive traits for use in wheat breeding and crop  
818 improvement. *Heredity*  
819
- 820 Lenth RV (2020) emmeans: estimated marginal means, aka least-squares means. R package  
821 version 1.5.3. <https://CRAN.R-project.org/package=emmeans>.  
822
- 823 Martinez SA, Shorinola O, Conselman S. *et al.* (2020). Exome sequencing of bulked segregants  
824 identified a novel TaMKK3-A allele linked to the wheat ERA8 ABA-hypersensitive  
825 germination phenotype. *Theoretical and Applied Genetics* 133: 719–736.  
826
- 827 Li X, Wang W, Wang Z, Li K, Lim YP, Piao Z (2015). Construction of chromosome segment  
828 substitution lines enables QTL mapping for flowering and morphological traits in *Brassica*  
829 *rapa*. *Frontiers in Plant Science* 6:432. doi:10.3389/fpls.2015.00432  
830
- 831 Luo D, Ganesh S, Koolaard J (2020). Predictmeans: calculate predicted means for linear  
832 models. R package version 1.0.4. <https://CRAN.R-project.org/package=predictmeans>.  
833
- 834 Lippman ZB, Semel Y, Zamir D (2007) An integrated view of quantitative trait variation using  
835 tomato interspecific introgression lines. *Current Opinions in Genetics and Development* 17:  
836 545-552.  
837
- 838 Mcintosh R, Dubcovsky J, Rogers WJ, Morris *et al.* (2013) Catalogue of gene symbols for  
839 wheat. In 12th International Wheat Genetics Symposium, Yokohama, Japan.  
840
- 841 Ma L, Li T, Hao C, Wang Y, Chen X, Zhang X (2016) *TaGS5-3A*, a grain size gene selected  
842 during wheat improvement for larger kernel and yield. *Plant Biotechnology Journal*. 14: 1269-  
843 1280. <https://doi.org/10.1111/pbi.12492>  
844
- 845 Mackay IJ, Bansept-Basler P, Barber T, Bentley AR, Cockram J, Gosman N, Greenland AJ,  
846 Horsnell R, Howells R, O’Sullivan D, Rose GA, Howell P (2014) An eight-parent Multiparent  
847 Advanced Generation Inter-Cross population for winter-sown wheat: creation, properties and  
848 validation. *G3: Genes, Genomes, Genetics* 4:1603-1610.  
849

- 850 Millet E, Rong J-K, Qualset C, Mcguire PE, Bernard A, Sourdille P, Feldman M (2014) Grain  
851 yield and grain protein percentage of common wheat lines with wild emmer chromosome-arm  
852 substitutions. *Euphytica*. 195. [10.1007/s10681-013-0975-2](https://doi.org/10.1007/s10681-013-0975-2).
- 853
- 854 Milne I, Shaw P, Stephen G, *et al.* (2010) Flapjack-graphical genotype visualization.  
855 *Bioinformatics* 26: 3133–3134. <https://doi.org/10.1093/bioinformatics/btq580>
- 856
- 857 Nevo E (2014) Evolution of wild emmer wheat and crop improvement. *Journal of Systematics*  
858 *and Evolution* 52: 673-696.
- 859
- 860 Nie X, Tu J, Wang B, Zhou X, Lin Z (2015) A BIL population derived from *G. hirsutum* and  
861 *G. barbadense* provides a resource for cotton genetics and breeding. *PLoS ONE* 10: e0141064.  
862 <https://doi.org/10.1371/journal.pone.0141064>
- 863
- 864 Olmos S, Distelfeld A, Chicaiza O, Schlatter AR, Fahima T, Echenique V, Dubcovsky J (2003)  
865 Precise mapping of a locus affecting grain protein content in durum wheat. *Theoretical and*  
866 *Applied Genetics* 107: 1243-1251.
- 867
- 868 Paradis E, Schliep K (2018) Ape 5.0: an environment for modern phylogenetics and  
869 evolutionary analyses in R. *Bioinformatics* 35: 526-528.
- 870
- 871 Przewieslik-Allen A, Wilkinson PA, Burr ridge A, Winfield M, Dai X, Beaumont M, King J,  
872 Yang C, Griffiths S, Wingen L, Horsnell R, Bentley AR, Shewry P, Barker GLA, Edwards KJ  
873 (2021) The role of gene flow and chromosomal instability in shaping the bread wheat genome.  
874 *Nature Plants* 7: 172-183.
- 875
- 876 Qiao W, Qi L, Cheng Z, Su L, Li J, Yan S, Ren J, Zheng Z, Yang Q (2016) Development and  
877 characterization of chromosome segment substitution lines derived from *Oryza rufipogon* in  
878 the genetic background of *O. sativa* spp. *indica* cultivar 9311. *BMC Genomics* 17: 580.  
879 <https://doi.org/10.1186/s12864-016-2987-5>.
- 880
- 881 R Core Team (2020). R: A language and environment for statistical computing. R Foundation  
882 for Statistical Computing, Vienna, Austria. URL <https://www.R-project.org/>.
- 883

- 884 Rae AM, Howell EC, Kearsley MJ (1999) More QTL for flowering time revealed by  
885 substitution lines in *Brassica oleracea*. *Heredity* 83: 586-596. doi:10.1038/sj.hdy.6886050  
886
- 887 Ramsay LD, Jennings DE, Bohuon EJR, Arthur AE, Lydiate DJ *et al.* (1996) The construction  
888 of a substitution library of recombinant backcross lines in *Brassica oleracea* for the precision  
889 mapping of quantitative trait loci. *Genome*. 39: 558–567.  
890
- 891 Rodriguez-Alvarez MX, Boer MP, van Eeuwijk FA, Eilers PHC (2018) Correcting for spatial  
892 heterogeneity in plant breeding experiments with P-splines. *Spatial Statistics* 23:52-71  
893 <https://doi.org/10.1016/j.spasta.2017.10.003>  
894
- 895 Scheipl F, Greven S, Kuechenhoff H (2008) Size and power of tests for a zero random effect  
896 variance or polynomial regression in additive and linear mixed models. *Computational*  
897 *Statistics and Data Analysis*, 52:3283-3299.  
898
- 899 Scott MF, Ladejobi O, Amer S *et al.* (2020) Multi-parent populations in crops: a toolbox  
900 integrating genomics and genetic mapping with breeding. *Heredity* 125: 396-416.  
901
- 902 Scott MF, Fradgley N, Bentley AR, Brabbs T, Corke F, Gardner KA *et al.* (2021) Limited  
903 haplotype diversity underlies polygenic trait architecture across 70 years of wheat breeding.  
904 *Genome Biology*, 22, 137.  
905
- 906 Sears ER (1953) Nullisomic analysis in common wheat. *American Naturalist* 87: 245–252.  
907
- 908 Sears ER (1954) The aneuploids of common wheat. *Research Bulletin Missouri Agricultural*  
909 *Experiment Station* 572: 1-59.  
910
- 911 Simmonds J, Scott P, Brinton J, Mestre TC, Bush M, Del Blanco A, Dubcovsky J, Uauy C  
912 (2016) A splice acceptor site mutation in *TaGW2-A1* increases thousand grain weight in  
913 tetraploid and hexaploid wheat through wider and longer grains. *Theoretical and Applied*  
914 *Genetics* 129:1099–1112.  
915
- 916 Sourdille P, Cadalen T, Gay G, Gill B, Bernard M. (2002) Molecular and physical mapping of  
917 genes affecting awning in wheat. *Plant Breeding* 121, 320–324.



918

919 Stebbins GL (1950) *Variation and Evolution in Plants*. Columbia University Press, New York,  
920 USA.

921

922 Tian F, Li DJ, Fu Q, Zhu ZF, Fu YC, Wang XK, Sun CQ (2006) Construction of introgression  
923 lines carrying wild rice (*Oryza rufipogon* Griff.) segments in cultivated rice (*Oryza sativa* L.)  
924 background and characterization of introgressed segments associated with yield-related traits.  
925 *Theoretical and Applied Genetics* 112: 570–580.

926

927 Uauy C, Brevis JC, Dubcovsky J (2006a) The high grain protein content gene *Gpc-B1*  
928 accelerates senescence and has pleiotropic effects on protein content in wheat. *Journal of*  
929 *Experimental Botany* 57: 2785-94.

930

931 Uauy C, Distelfeld A, Fahima T, Blechl A, Dubcovsky J (2006b) A NAC gene regulating  
932 senescence improves grain protein, zinc, and iron content in wheat. *Science* 314:1298-301.

933

934 Unrau J, Person C, Kuspira J (1956) Chromosome substitution in hexaploid wheat. *Canadian*  
935 *Journal of Botany* 34: 629–640.

936

937 Urrutia M, Bonet J, Arús P, Monfort A (2015) A near-isogenic line (NIL) collection in diploid  
938 strawberry and its use in the genetic analysis of morphologic, phenotypic and nutritional  
939 characters. *Theoretical and Applied Genetics* 128:1261-1275. doi:10.1007/s00122-015-2503-  
940 3.

941

942 Walkowiak S, Gao L, Monat C *et al.* (2020) Multiple wheat genomes reveal global variation  
943 in modern breeding. *Nature* 588 : 277–283 <https://doi.org/10.1038/s41586-020-2961-x>

944

945 Wang D, Yu K, Jin D, Sun L, Chu J, Wu W *et al.* (2020) Natural variations in the promoter of  
946 *Awn Length Inhibitor 1 (ALI-1)* are associated with awn elongation and grain length in common  
947 wheat. *The Plant Journal* 101; 1075–1090.

948

949 Watkins AE, Ellerton S (1940) Variation and genetics of the awn in *Triticum*. *Journal of*  
950 *Genetics* 40: 243–270.

951

- 952 Wei T, Simko, V (2017) R Package “Corrplot”: visualization of a correlation matrix. Available  
953 online: <https://github.com/taiyun/corrplot>  
954
- 955 Wilkinson PA, Winfield MO, Barker GLA, Tyrell S, Bian X *et al.* (2016) CerealsDB 3.0:  
956 expansion of resources and data integration. *BMC Bioinformatics* [doi.org/10.1186/s12859-](https://doi.org/10.1186/s12859-0161139-x)  
957 [0161139-x](https://doi.org/10.1186/s12859-0161139-x)  
958
- 959 Wingen LU, West C, Leverington-Waite M, Collier S, Orford S, Goram R, Yang CY, King J,  
960 Allen AM, Burridge A, Edwards KJ, Griffiths S (2017) Wheat landrace genome diversity.  
961 *Genetics*. 205: 1657-1676.  
962
- 963 Wu J, Jenkins JN, McCarty JC, Saha S, Stelly DM (2006) An additive-dominance model to  
964 determine chromosomal effects in chromosome substitution lines and other gemplasms.  
965 *Theoretical and Applied Genetics* 112: 391–399.  
966
- 967 Würschum T, Langer SM, Longin CFH, Tucker MR, Leiser WL (2020a) Refining the genetic  
968 architecture of flag leaf glaucousness in wheat. *Theoretical and Applied Genetics*, 133, 981–  
969 991.  
970
- 971 Würschum T, Jähne F, Phillips AL, Langer SM, Longin CFH, Tucker MR, Leiser WL (2020b)  
972 Misexpression of a transcriptional repressor candidate provides a molecular mechanism for the  
973 suppression of awns by *Tipped 1* in wheat. *Journal of Experimental Botany*, 71, 3428–3436.  
974
- 975 Yu J, Holland JB, McMullen MD, Buckler ES (2008) Genetic design and statistical power of  
976 nested association mapping in maize. *Genetics* 178: 539-551.  
977 [doi:10.1534/genetics.107.074245](https://doi.org/10.1534/genetics.107.074245)  
978
- 979 Yang J, Zhou Y, Wu Q. *et al.* (2019) Molecular characterization of a novel *TaGL3-5A* allele  
980 and its association with grain length in wheat (*Triticum aestivum* L.). *Theoretical and Applied*  
981 *Genetics* 132:1799–1814. <https://doi.org/10.1007/s00122-019-03316-1>  
982
- 983 Yoshioka M, Iehisa JCM, Ohno R, Kimura T, Enoki H, Nishimura S *et al.* (2017) Three  
984 dominant awnless genes in common wheat: Fine mapping, interaction and contribution to  
985 diversity in awn shape and length. *PLoS ONE*, 12: 1–21.

986

987 Zemetra RS, Morris WR, Schmidt JW (1986) Gene locations for heading date using reciprocal  
988 chromosome substitutions in winter wheat. *Crop Science* 26:531–533.

989

990 Zhai H, Gong W, Tan Y, Liu A, Song W, Li J, Deng Z, Kong L, Gong J, Shang H, Chen T, Ge  
991 Q, Shi Y, Yuan Y (2016) Identification of chromosome segment substitution lines of  
992 *Gossypium barbadense* introgressed in *G. hirsutum* and quantitative trait locus mapping for  
993 fiber quality and yield traits. *PLoS One* 11: e0159101. doi: 10.1371/journal.pone.0159101.

994

995 Zhang P, Dundas IS, McIntosh RA, Xu SS, Park RF, Gill BS, et al. (2015) Wheat–Aegilops  
996 Introgressions. In: *Alien Introgression in Wheat: Cytogenetics, Molecular Biology, and*  
997 *Genomics* (Molnár-Láng M, Ceoloni C, Doležel J, eds) pp 221-243. New York: Springer. doi:  
998 10.1007/978-3-319-23494-6

999

1000 Zhao X, Lv L, Li J, Ma F, Bai S, Zhou Y, Zhang D, Li S, Song CP (2021) Genome-wide  
1001 association study of grain shapes in *Aegilops tauschii*. *Euphytica*, 217: 1-14.

1002

1003

1004
